# Supplementary material for: The realization of autonomous, aircraft-based, real-time aerosol mass spectrometry in the upper troposphere and lower stratosphere
Source: Copernicus journal article supplement (doi:10.5194/egusphere-2022-33), 2022-03-21
Supplement: Supplementary file 1 [file egusphere-2022-33-supplement.pdf]

## Supplement of:

# The realization of autonomous, aircraft-based, real-time aerosol mass spectrometry in the upper troposphere and lower stratosphere

Antonis Dragoneas<sup>1,2</sup>, Sergej Molleker<sup>1,2</sup>, Oliver Appel<sup>1,2</sup>, Andreas Hünig<sup>1,2</sup>, Thomas Böttger<sup>1</sup>, Markus Hermann<sup>3</sup>, Frank Drewnick<sup>1</sup>, Johannes Schneider<sup>1</sup>, Ralf Weigel<sup>2</sup> and Stephan Borrmann<sup>1,2</sup>

<sup>1</sup> Max Planck Institute for Chemistry (Otto Hahn Institute), Particle Chemistry Department, Mainz, Germany

<sup>2</sup> Institute for Physics of the Atmosphere, Johannes Gutenberg University Mainz, Germany

<sup>3</sup> Leibniz Institute for Tropospheric Research, Leipzig, Germany

Correspondence to: Antonis Dragoneas (a.dragoneas@mpic.de)

### S1 Instrument design

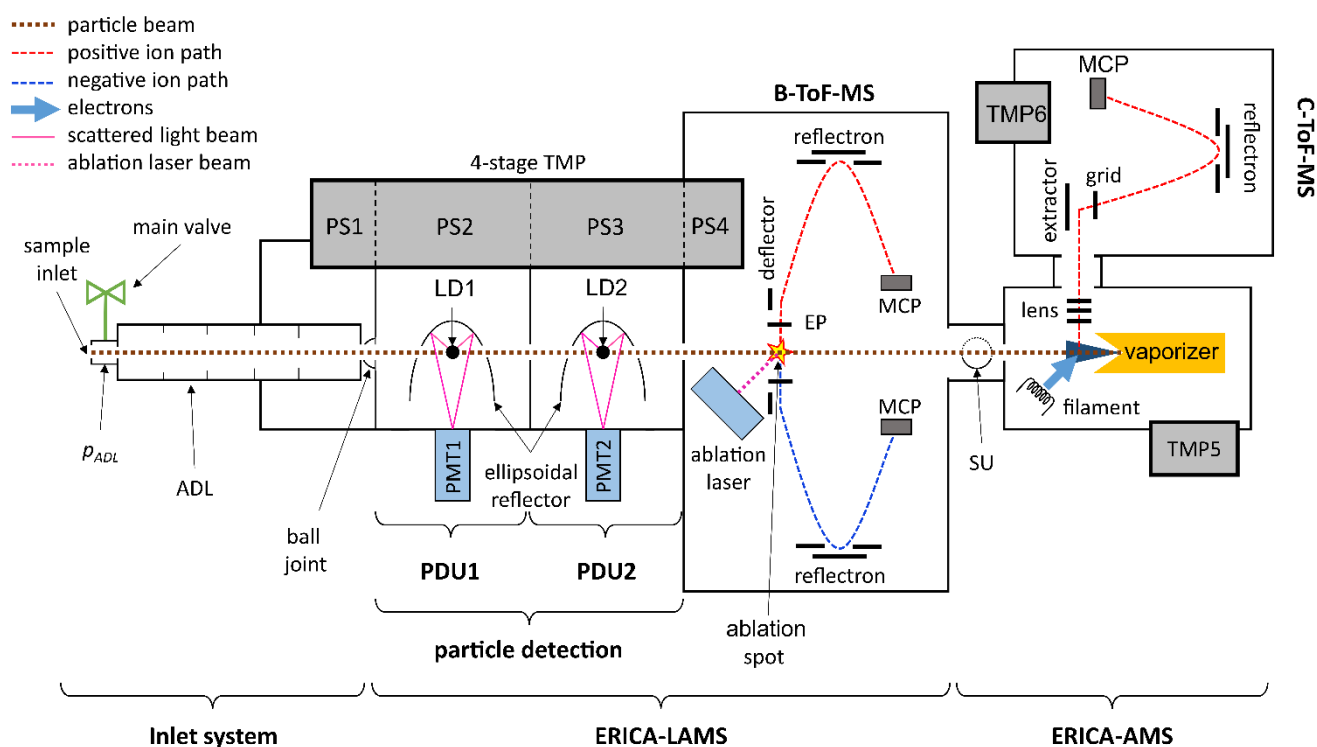

Figure S1 - A simplified drawing of the ERICA mass spectrometer. This figure is also presented in Hünig et al. (2021).

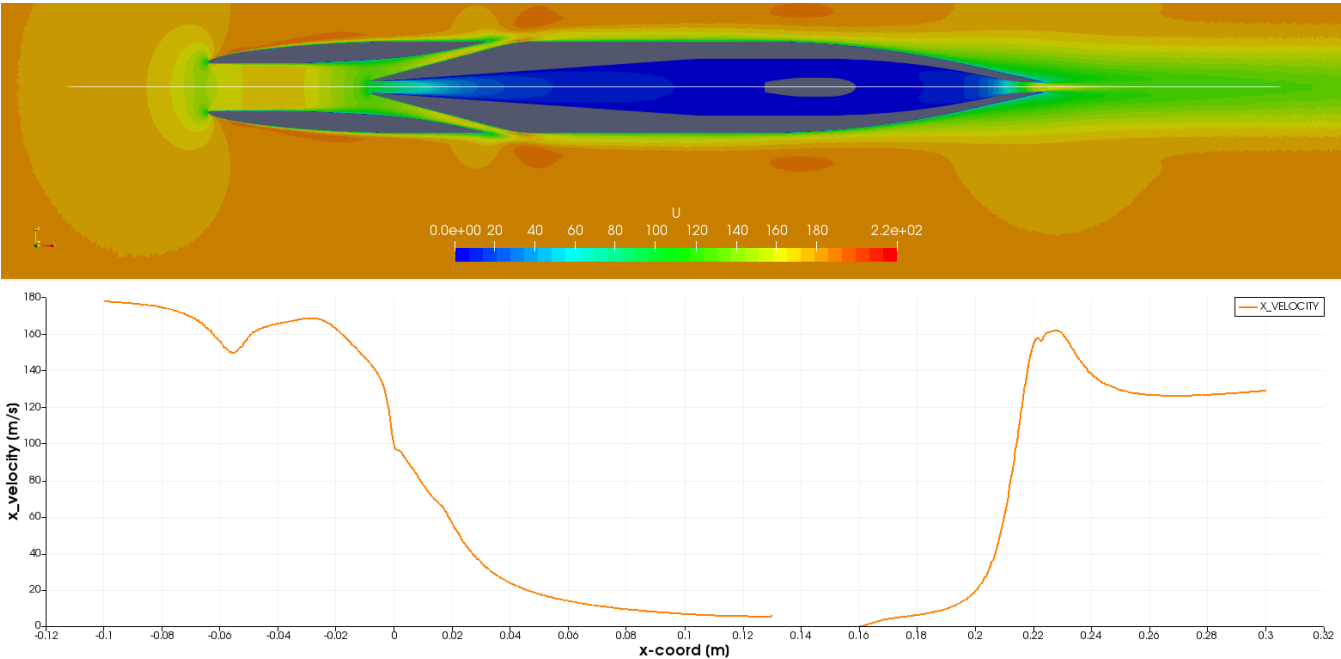

20

Figure S2 - Top panel: velocity distribution inside the inlet head (x-component) at 180 m s<sup>-1</sup> true air speed and 55 hPa ambient pressure, modelled using Computational Fluid Dynamics (CFD) software (Ansys Fluent). Bottom panel: velocity profile along the inlet head long axis, only the x-component for the same parameters is shown. The plot illustrates that in the outer diffuser the velocity is reduced from 180 m s<sup>-1</sup> to 6-7 m s<sup>-1</sup>. Further reduction is accomplished by the inner diffuser, which is not included in this model.

S3 Software

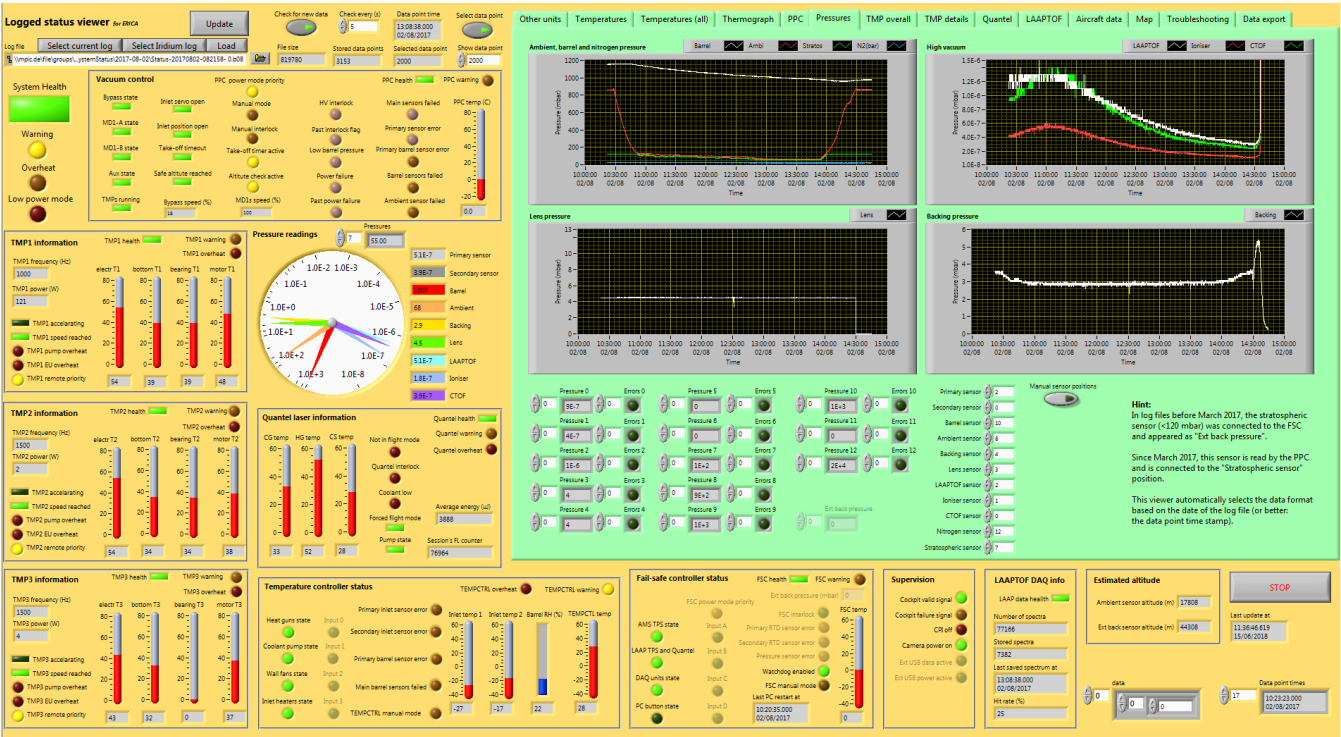

25

Figure S3 – The graphical user interface for remote system monitoring. The green system health indicator (top left) confirms that all critical parameters are within their respective acceptable ranges.

S3 Flight data

Table S1 - Flight information for the StratoClim project including all flights from Kalamata (KLX) and Kathmandu (KTM) airports

| Flight name | Date (DD/MM/YYYY) | Flight duration (h:min) | Southern-most Latitude (° N) | Northern-most Latitude (° N) | Western-most Longitude (° E) | Eastern-most Longitude (° E) | Maximum flight altitude – barom. (m) | Maximum flight altitude – GPS (m) | Minimum ambient temperature (°C) | Minimum ambient pressure (hPa) | Number of recorded SAP bipolar spectra |
|-------------|-------------------|-------------------------|------------------------------|------------------------------|------------------------------|------------------------------|--------------------------------------|-----------------------------------|----------------------------------|--------------------------------|----------------------------------------|
| KLX 1       | 30/08/2016        | 4:01                    | 34.2060                      | 38.4280                      | 21.2940                      | 30.8870                      | 17761                                | 18276                             | -71.6                            | 77.8                           | 3329                                   |
| KLX 2       | 01/09/2016        | 4:27                    | 34.4768                      | 41.0369                      | 21.3012                      | 27.7897                      | 19569                                | 20030                             | -72.7                            | 58.5                           | 6314                                   |
| KLX 3       | 06/09/2016        | 3:34                    | 33.3993                      | 37.2623                      | 21.6674                      | 31.8126                      | 19845                                | 20239                             | -71.7                            | 56.0                           | 2404                                   |
| KTM 1       | 27/07/2017        | 2:46                    | 23.8790                      | 27.7864                      | 84.9838                      | 89.4201                      | 18999                                | 19463                             | -79.5                            | 64.0                           | 20518                                  |
| KTM 2       | 29/07/2017        | 4:26                    | 26.8689                      | 29.4116                      | 80.6550                      | 87.3895                      | 19994                                | 20477                             | -78.9                            | 54.7                           | 18605                                  |
| KTM 3       | 31/07/2017        | 4:39                    | 21.2786                      | 27.7943                      | 78.8450                      | 85.8700                      | 19992                                | 20372                             | -80.2                            | 54.7                           | 23927                                  |
| KTM 4       | 02/08/2017        | 4:01                    | 26.9618                      | 29.4688                      | 80.8401                      | 87.2466                      | 20017                                | 20447                             | -81.6                            | 54.5                           | 14124                                  |
| KTM 5       | 04/08/2017        | 4:21                    | 26.9950                      | 29.4143                      | 80.9130                      | 87.3183                      | 19855                                | 20274                             | -81.8                            | 55.9                           | 15868                                  |
| KTM 6       | 06/08/2017        | 4:05                    | 20.8300                      | 27.7850                      | 84.9920                      | 90.6600                      | 16249                                | 17000                             | -81.4                            | 98.7                           | 18003                                  |
| KTM 7       | 08/08/2017        | 3:34                    | 20.9536                      | 27.7890                      | 85.0355                      | 86.5105                      | 18970                                | 19429                             | -85.8                            | 64.3                           | 13625                                  |
| KTM 8       | 10/08/2017        | 3:45                    | 24.1188                      | 29.0504                      | 81.7349                      | 86.2741                      | 18653                                | 19158                             | -86.1                            | 67.6                           | 13608                                  |
| Total       |                   | 49:26                   |                              |                              |                              |                              |                                      |                                   |                                  |                                | 150325                                 |

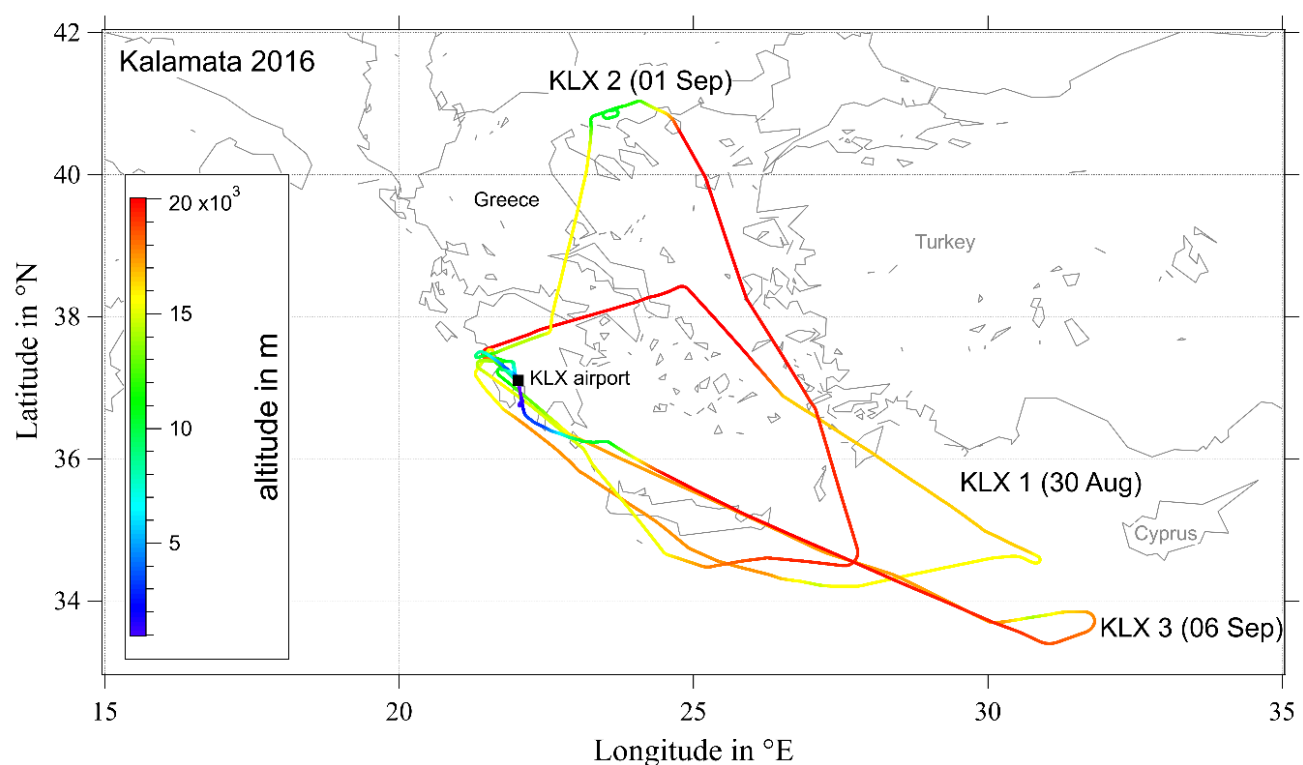

Figure S4 - Map of all three flights from Kalamata (KLX) airport. The colour scale depicts the flight altitude.

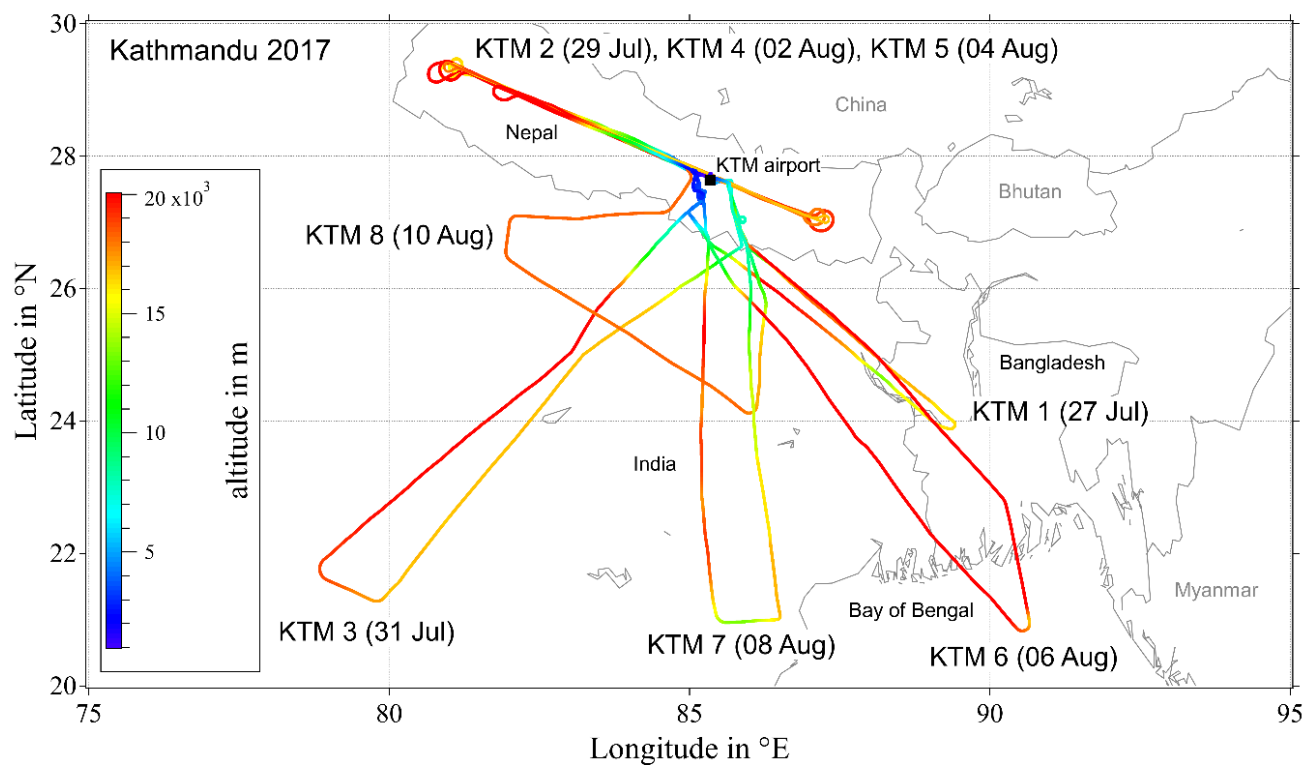

**Figure S5 - Map of all eight flights from Kathmandu (KTM) airport. The colour scale depicts the flight altitude.**



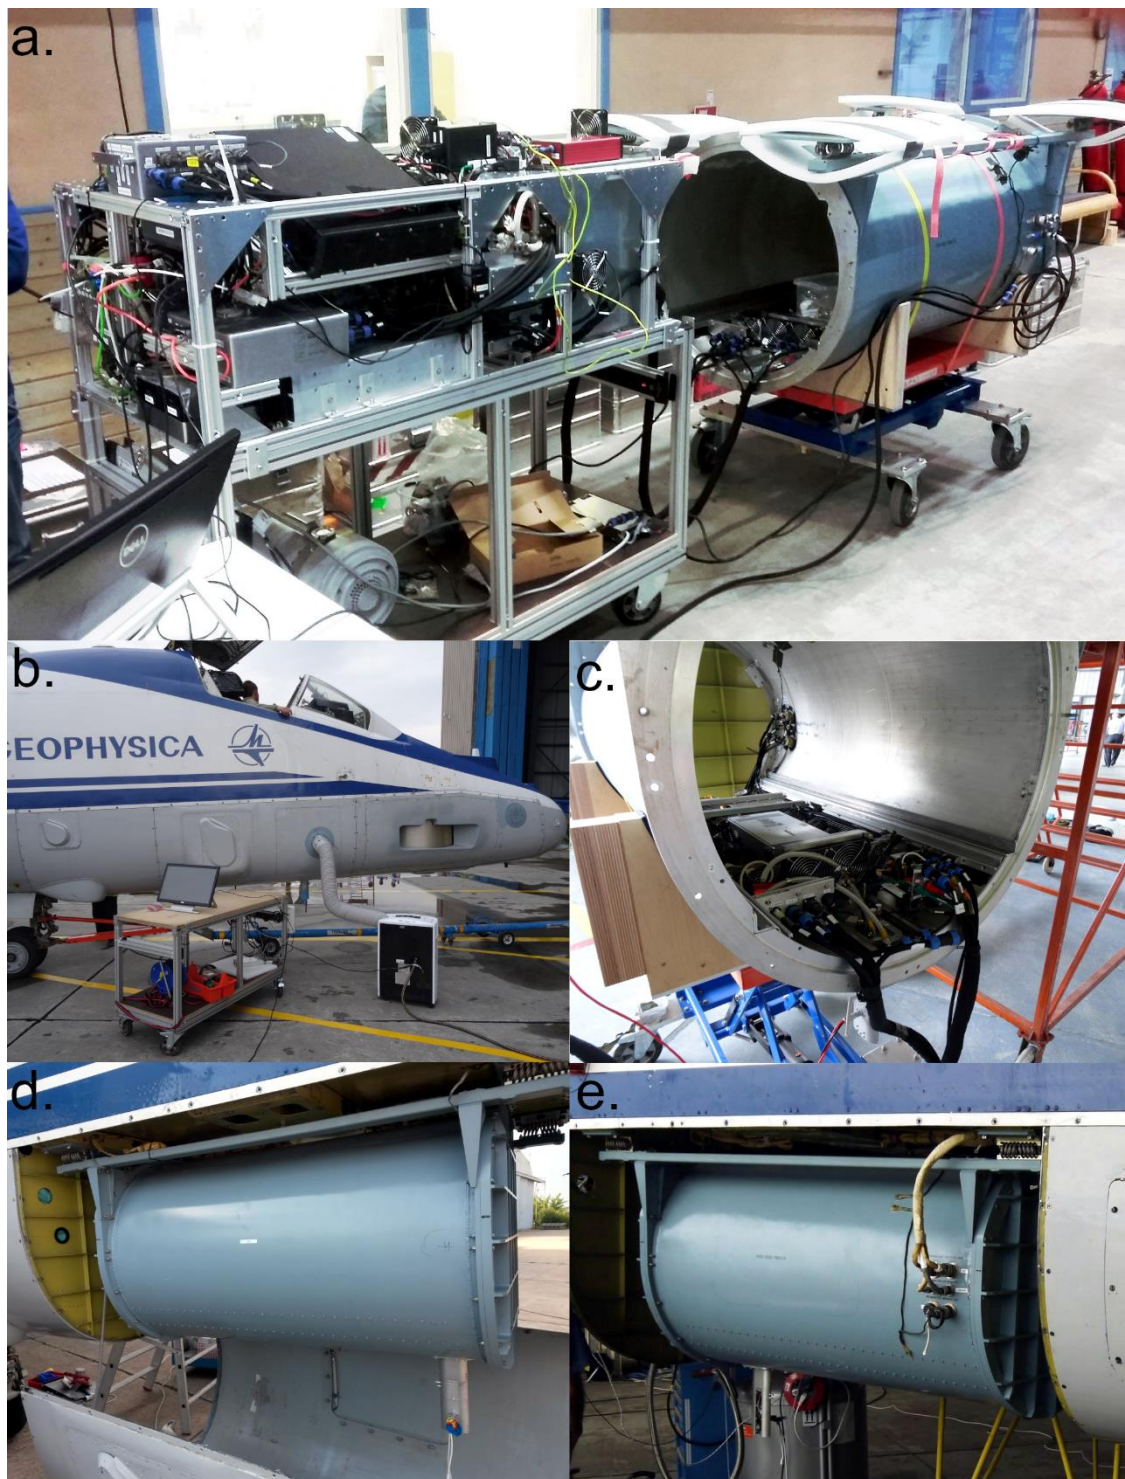

**Figure S6 - Photographs from the ERICA deployment in the field: (a) the instrument and the Pressure Vessel (PV) in the hangar before installation, (b) the M-55 *Geophysica* at the apron with an air-conditioning unit attached to Bay II providing cooling to the ERICA, (c) close-up of the equipment installed at the bottom of the PV, (d) the ERICA installed on the aircraft as seen from the starboard side, the coiled-wire vibration isolators can be seen at the top and the removed cowl at the bottom of the photograph, and (e) the ERICA installed on the aircraft as seen from the port side, the electrical connections to the aircraft can be seen on the RHS of the photograph.**

## References

Hünig, A., Appel, O., Dragoneas, A., Molleker, S., Clemen, H. C., Helleis, F., Klimach, T., Köllner, F., Böttger, T., Drewnick, F., Schneider, J., and Borrmann, S.: Design, characterization, and first field deployment of a novel aircraft-based aerosol mass spectrometer combining the laser ablation and flash vaporization techniques, *Atmos. Meas. Tech. Discuss.*, 2021, 1-43 [preprint], 10.5194/amt-2021-271, 2021.
